# Supplementary material for: Scalable continuous evolution for the generation of diverse enzyme variants encompassing promiscuous activities
Source: PubMed Central journal article supplement (PMC7648111; doi:10.1038/s41467-020-19539-6), 2020-11-06
Supplement: 41467_2020_19539_MOESM6_ESM.pdf [file 41467_2020_19539_MOESM6_ESM.pdf]

**Title:** Supplementary Data 1

**Description:** Plasmids used in Rix et al. 2020.

**Title:** Supplementary Data 2

**Description:** Primers used in Rix et al. 2020.

**Title:** Supplementary Data 3

**Description:** Yeast strains used in Rix et al. 2020.

**Title:** Supplementary Data 4

**Description:** Mutations and identification information for all individual TmTrpB sequences used in Rix et al. 2020.
