# Supplementary material for: Scalable continuous evolution for the generation of diverse enzyme variants encompassing promiscuous activities
Source: Nat Commun. 2020 Nov 6;11:5644. doi: 10.1038/s41467-020-19539-6 (PMC7648111; doi:10.1038/s41467-020-19539-6)
Supplement: Supplementary file 5 — Supplementary Data 4 [file 41467_2020_19539_MOESM5_ESM.xlsx]

## Sheet: Sheet1
Supplementary Data 4 | Mutations and identification information for all individual TmTrpB sequences used in Rix et al. 2020.
variant set	variant name	culture name	number of nonsynonymous mutations	number of synonymous mutations	list of all nonsynonymous mutations	starting sequence	nucleotide sequence
1	WT-100-1-A	WT-100-1	13	3	G3D, Y28H, E29G, D34G, P54T, I69V, K96L, A118V, F122S, V245A, I271V, T292S, A351V	TmTrpB	ATGAAAGACTACTTCGGTCCGTACGGTGGCCAGTACGTGCCGGAAATCCTGATGCCAGCTCTGGAAGAACTGGAAGCTGCGCACGGAGAAATCATGAAAGGTGAGTCTTTCTGGAAAGAATTCAATGACCTGCTGCGCGATTATGCGGGTCGTCCGACTACGCTGTACTTCGCACGTCGTCTGTCCGAGAAATACGGTGCTCGCGTATATCTGAAACGTGAAGACCTGCTGCATACTGGTGCGCATAAAATCAATAACGCTATCGGCCAGGTTCTGCTGGCAAAACTAATGGGCAAAACCCGTATCATTGCTGAAACGGGTGCTGGTCAGCACGGCGTAGCAACTGCTACCGTAGCAGCGCTGTCCGGTATGGAATGTGTAATCTATATGGGCGAAGAA…
1	WT-100-2-A	WT-100-2	9	7	G3D, E22K, F37L, W38R, L92P, A104V, I212V, I223T, S302P	TmTrpB	ATGAAAGACTACTTCGGTCCGTACGGTGGCCAGTACGTGCCGGAAATCCTGATGCCAGCTCTGAAAGAACTGGAAGCTGCGTACGAAGAAATCATGAAAGATGAGTCTCTCCGGAAAGAATTCAATGACCTGCTGCGCGATTATGCGGGTCGTCCGACTCCGCTGTACTTCGCACGTCGTCTGTCCGAAAAATACGGTGCTCGCATCTATCTGAAACGTGAAGACCTGCTGCATACTGGTGCGCATAAAATCAACAACGCTATCGGCCAGGTTCCGCTGGCAAAAAAAATGGGCAAAACCCGTATCATTGTTGAAACGGGTGCTGGTCAGCACGGCGTAGCAACTGCTACCGCAGCAGCGCTGTTCGGTATGGAATGTGTAATCTATATGGGCGAAGAA…
1	WT-003-1-A	WT-003-1	7	1	A20V, A118V, F122S, V245A, I271V, T292S, A351V	TmTrpB	ATGAAAGGCTACTTCGGTCCGTACGGTGGCCAGTACGTGCCGGAAATCCTGATGCCAGTTCTGGAAGAACTGGAAGCTGCGTACGAAGAAATCATGAAAGATGAGTCTTTCTGGAAAGAATTCAATGACCTGCTGCGCGATTATGCGGGTCGTCCGACTCCGCTGTACTTCGCACGTCGTCTGTCCGAAAAATACGGTGCTCGCATCTATCTGAAACGTGAAGACCTGCTGCATACTGGTGCGCATAAAATCAATAACGCTATCGGCCAGGTTCTGCTGGCAAAAAAAATGGGCAAAACCCGTATCATTGCTGAAACGGGTGCTGGTCAGCACGGCGTAGCAACTGCTACCGTAGCAGCGCTGTCCGGTATGGAATGTGTAATCTATATGGGCGAAGAA…
1	Q90*-003-1-A	Q90*-003-1	6	11	Y8H, *90Q, M97T, N167D, S243P, S302P, S335P	TmTripleQ90*	ATGAAAGGCTACTTCGGTCCGCACGGTGGCCAGTACGTGCCAGAAATCCTGATGGGAGCTCTGGAAGAACTGGAAGCTGCGTACGAAGAAATCATGAAAGATGAGTCTTTCTGGAAAGAATTCAATGACCTGCTACGCGATTATGCGGGTCGTCCGACTCCGCTGTACTTCGCACGTCGTCTGTCCGAAAAATACGGTGCTCGCGTATATCTGAAACGTGAAGACCTGCTGCATACTGGTGCGCATAAAATCAATAACGCTATCGGCCAGGTTCTGCTGGCAAAAAAAACGGGCAAAACCCGTATCATTGCTGAAACGGGTGCTGGTCAGCACGGCGTAGCAACTGCTACCGCAGCAGCGCTGTTCGGTATGGAATGTGTGATCTATATGGGCGAAGAA…
1	Q90*-003-1-B	Q90*-003-1	11	15	Y8H, M18V, A20P, F57L, *90Q, M97T, N167D, S243P, S302P, S335P, A351V, Y383C	TmTripleQ90*	ATGAAAGGCTACTTCGGTCCGCACGGTGGCCAGTACGTGCCAGAAATCCTGGTGGGACCTCTGGAAGAACTGGAAGCTGCGTACGAAGAAATCATGAAAGATGAGTCTTTCTGGAAAGAATTCAATGACCTGCTACGCGATTATGCGGGTCGTCCGACTCCGCTGTACCTCGCACGTCGTCTGTCCGAAAAATACGGTGCTCGCGTGTATCTGAAACGTGAAGACCTGCTGCATACTGGTGCGCATAAAATCAATAACGCTATCGGCCAGGTTCTGCTGGCAAAAAAAACGGGTAAAACCCGTATCATTGCTGAAACGGGTGCTGGTCAGCACGGCGTAGCAACTGCTACCGCAGCAGCGCTGTTCGGTATGGAATGTGTGATCTATATGGGCGAAGAA…
1	Tri-003-1-A	Tri-003-1	9	3	E15K, K33R, A58T, N167D, V245A, G253D, I271V, A351V, R385H	TmTriple	ATGAAAGGCTACTTCGGTCCGTACGGTGGCCAGTACGTGCCAAAAATCCTGATGGGAGCTCTGGAAGAACTGGAAGCTGCGTACGAAGAAATCATGAGAGATGAGTCTTTCTGGAAAGAATTCAATGACCTGCTGCGCGATTATGCGGGTCGTCCGACTCCGCTGTACTTCACACGTCGTCTGTCCGAAAAATACGGTGCTCGCGTATATCTGAAACGTGAAGACCTGCTGCATACTGGTGCGCATAAAATCAATAACGCTATCGGCCAGGTTCTGCTGGCAAAAAAAATGGGCAAAACCCGTATCATTGCTGAAACGGGTGCTGGTCAGCACGGCGTAGCAACTGCTACCGCAGCAGCGCTGTTCGGTATGGAATGTGTAATCTATATGGGCGAAGAA…
1	Tri-003-1-B	Tri-003-1	11	4	E15K, A58T, E63G, A118V, A119T, I184V, I271V, Y273C, I332V, S335P, A351V	TmTriple	ATGAAAGGCTACTTCGGTCCGTACGGTGGCCAGTACGTGCCAAAAATCCTGATGGGAGCTCTGGAAGAACTGGAAGCTGCGTACGAAGAAATCATGAAAGATGAGTCTTTCTGGAAAGAATTCAATGACCTGCTGCGCGATTATGCGGGTCGTCCGACTCCGCTGTACTTCACACGCCGTCTGTCCGGAAAATACGGTGCTCGCGTATATCTGAAACGTGAAGACCTGCTGCATACTGGTGCGCATAAAATCAACAACGCTATCGGCCAGGTTCTGCTGGCAAAAAAAATGGGCAAAACCCGTATCATTGCTGAAACGGGTGCTGGTCAGCACGGCGTAGCAACTGCTACCGTAACAGCGCTGTTCGGTATGGAATGTGTGATCTATATGGGCGAAGAA…
1	Tri-003-1-C	Tri-003-1	9	3	E15K, I31T, A58T, A118V, E143Q, G217S, V245A, S292T, G339D	TmTriple	ATGAAAGGCTACTTCGGTCCGTACGGTGGCCAGTACGTGCCAAAAATCCTGATGGGAGCTCTGGAAGAACTGGAAGCTGCGTACGAAGAAACCATGAAAGATGAGTCTTTCTGGAAAGAATTCAATGACCTGCTGCGCGATTATGCGGGTCGTCCGACTCCGCTGTACTTCACACGTCGTCTGTCCGAAAAATACGGCGCTCGCGTATATCTGAAACGTGAAGACCTGCTGCATACTGGTGCGCATAAAATCAATAACGCTATCGGCCAGGTTCTGCTGGCAAAAAAAATGGGCAAAACCCGTATCATTGCTGAAACGGGTGCTGGTCAGCACGGCGTAGCAACTGCTACCGTAGCAGCGCTGTTCGGTATGGAATGTGTAATCTATATGGGCGAAGAA…
1	Tri-003-2-A	Tri-003-2	9	6	E15K, A58T, A118V, E143Q, T179A, V250I, T259A, I271V, A351V	TmTriple	ATGAAAGGCTACTTCGGTCCGTACGGTGGCCAGTACGTGCCAAAAATCCTGATGGGAGCTCTGGAAGAACTGGAAGCTGCGTACGAAGAAATCATGAAAGATGAGTCTTTCTGGAAAGAATTCAATGACCTGCTGCGCGATTATGCGGGTCGTCCGACTCCGCTGTACTTCACACGTCGTCTGTCCGAAAAATACGGTGCTCGCGTATATCTGAAACGTGAAGACCTGCTGCACACTGGTGCGCATAAAATCAATAACGCTATCGGCCAGGTTCTGCTGGCAAAAAAAATGGGCAAAACCCGTATCATTGCTGAAACGGGTGCTGGTCAGCACGGCGTAGCAACTGCTACCGTAGCAGCGCTGTTCGGTATGGAATGTGTAATCTATATGGGCGAAGAA…
1	Tri-100-1-A	Tri-100-1	10	5	E22K, I88T, K95R, T117A, A119T, Y193H, A234V, I248V, I271V, K361R	TmTriple	ATGAAAGGCTACTTCGGTCCGTACGGTGGCCAGTATGTGCCAGAAATCCTGATGGGAGCTCTGAAAGAACTGGAAGCTGCGTACGAAGAAATCATGAAAGATGAGTCTTTCTGGAAAGAATTCAATGACCTGCTGCGCGATTATGCGGGTCGTCCGACTCCGCTGTACTTCGCACGTCGTCTGTCCGAAAAATACGGTGCTCGCGTATATCTGAAACGTGAAGACCTGCTACATACTGGTGCGCATAAAATCAATAACGCTACCGGCCAGGTTCTGCTGGCAAGAAAAATGGGCAAAACCCGTATCATTGCTGAAACGGGTGCTGGTCAGCACGGCGTAGCAACTGCTGCCGCAACAGCGCTGTTCGGTATGGAATGTGTAATCTATATGGGCGAAGAA…
1	Tri-100-2-A	Tri-100-2	9	7	Y8H, A119T, F122S, N167D, I174F, I195T, E206G, Y352C, I388T	TmTriple	ATGAAAGGCTACTTCGGACCGCACGGTGGCCAGTACGTGCCAGAAATCCTGATGGGAGCTCTGGAAGAACTGGAAGCTGCGTACGAAGAAATCATGAAAGATGAGTCTTTCTGGAAAGAATTCAATGACCTGCTGCGCGATTATGCGGGTCGTCCGACTCCGCTGTACTTCGCACGTCGTCTGTCCGAAAAATACGGTGCTCGCGTATATCTGAAACGTGAAGACCTGCTGCATACTGGTGCGCATAAAATCAACAATGCTATCGGCCAGGTTCTGCTGGCAAAAAAAATGGGCAAAACCCGTATCATTGCTGAAACGGGTGCTGGTCAGCACGGTGTAGCAACTGCTACCGCAACAGCGCTGTCCGGTATGGAATGTGTAATCTATATGGGCGAAGAA…
1	Tri-100-2-B	Tri-100-2	8	6	E30G, K96L, P140L, N167D, I184F, L213P, G228S, I388T	TmTriple	ATGAAAGGCTACTTCGGTCCGTACGGTGGCCAGTACGTGCCGGAAATCCTGATGGGAGCTCTGGAAGAACTGGAAGCTGCGTACGAAGGAATCATGAAAGATGAGTCTTTCTGGAAAGAATTCAATGACCTGCTGCGCGATTATGCGGGTCGTCCGACTCCGCTGTACTTCGCACGTCGTCTGTCCGAGAAATACGGTGCTCGCGTATATCTGAAACGTGAAGACCTGCTGCATACTGGTGCGCATAAAATCAATAACGCTATCGGCCAGGTTCTGCTGGCAAAACTAATGGGCAAAACCCGTATCATTGCTGAAACGGGTGCTGGTCAGCACGGCGTAGCAACTGCTACCGCAGCAGCGCTGTTCGGTATGGAATGTGTAATCTATATGGGCGAAGAA…
1	Tri-100-3-A	Tri-100-3	5	3	K39E, K95_K96insK, T117A, K270E, I271N	TmTriple	ATGAAAGGCTACTTCGGTCCGTACGGTGGCCAGTACGTGCCAGAAATCCTGATGGGAGCTCTGGAAGAACTGGAAGCTGCGTACGAAGAAATCATGAAAGATGAGTCTTTCTGGGAAGAATTCAATGACCTGCTGCGCGATTATGCGGGTCGTCCGACTCCGCTGTACTTCGCACGTCGTCTGTCCGAAAAATACGGTGCTCGCGTGTATCTGAAACGTGAAGACCTGCTGCATACTGGTGCGCATAAAATCAATAACGCTATCGGCCAGGTTCTGCTGGCAAAAAAAAAAATGGGCAAAACCCGTATCATTGCTGAAACGGGTGCTGGTCAGCACGGCGTAGCAACTGCTGCCGCAGCAGCGCTGTTCGGTATGGAATGTGTAATCTATATGGGCGAA…
1	Tri-100-4-A	Tri-100-4	10	1	R46H, F57Y, A118T, G123A, N167D, I241V, A330V, A349T, G360D, Y383H	TmTriple	ATGAAAGGCTACTTCGGTCCGTACGGTGGCCAGTACGTGCCAGAAATCCTGATGGGGGCTCTGGAAGAACTGGAAGCTGCGTACGAAGAAATCATGAAAGATGAGTCTTTCTGGAAAGAATTCAATGACCTGCTGCACGATTATGCGGGTCGTCCGACTCCGCTGTACTACGCACGTCGTCTGTCCGAAAAATACGGTGCTCGCGTATATCTGAAACGTGAAGACCTGCTGCATACTGGTGCGCATAAAATCAATAACGCTATCGGCCAGGTTCTGCTGGCAAAAAAAATGGGCAAAACCCGTATCATTGCTGAAACGGGTGCTGGTCAGCACGGCGTAGCAACTGCTACCACAGCAGCGCTGTTCGCTATGGAATGTGTAATCTATATGGGCGAAGAA…
1	Tri-100-4-B	Tri-100-4	6	14	G3D, E30G, I102T, P140L, N167D, L213P	TmTriple	ATGAAAGACTACTTCGGTCCGTACGGTGGCCAGTACGTGCCGGAAATCCTGATGGGAGCTCTGGAAGAACTGGAAGCTGCGTACGAAGGAATCATGAAAGATGAGTCTTTCTGGAAAGAATTCAATGACCTGCTGCGCGATTATGCGGGTCGTCCGACTCCGCTGTACTTCGCACGTCGTCTGTCCGAGAAATACGGTGCTCGCGTATATCTGAAACGTGAAGACCTGCTGCATACTGGTGCACATAAAATCAACAACGCTATCGGTCAGGTTCTGCTGGCAAAAAAAATGGGCAAAACCCGCACCATTGCTGAAACGGGTGCTGGTCAGCACGGCGTAGCAACTGCTACCGCAGCAGCGCTGTTCGGTATGGAATGTGTAATCTATATGGGCGAAGAA…
1	Tri-100-4-C	Tri-100-4	7	11	G3D, D43G, R60C, I102T, N167D, L274S, L375V	TmTriple	ATGAAAGACTACTTCGGTCCGTACGGTGGCCAGTACGTGCCAGAGATCCTGATGGGAGCTCTGGAAGAACTGGAAGCTGCATACGAAGAAATCATGAAAGATGAGTCTTTCTGGAAAGAATTCAATGGCCTGCTGCGCGATTATGCGGGTCGTCCGACTCCGCTGTACTTCGCACGTTGTCTGTCCGAAAAATACGGTGCTCGCGTATATCTGAAACGTGAAGACCTGCTGCATACTGGTGCACATAAAATCAACAACGCTATCGGCCAGGTTCTGCTGGCAAAAAAAATGGGCAAAACCCGCACCATTGCTGAAACGGGTGCTGGTCAGCACGGCGTAGCAACTGCTACCGCAGCAGCGCTGTTCGGTATGGAATGTGTAATCTATATGGGCGAAGAA…
2	WT-100-1-B	WT-100-1	14	9	A20T, D47N, R60H, L76M, T100A, A118V, V127I, N176S, K268R, I271T, W286R, E313V, V378A, N380S	WT TmTrpB	ATGAAAGGCTACTTCGGTCCGTACGGTGGCCAGTACGTGCCGGAAATCCTGATGCCAACTCTGGAAGAACTGGAAGCTGCGTACGAAGAAATCATGAAAGATGAGTCTTTCTGGAAAGAATTCAATGACCTGCTGCGCAATTATGCGGGTCGCCCGACTCCGCTGTACTTCGCACGTCATCTGTCCGAAAAATACGGTGCTCGCATCTATCTGAAACGTGAAGACATGCTACATACTGGTGCGCATAAAATCAATAACGCTATCGGCCAGGTTCTGCTGGCAAAAAAAATGGGCAAAGCCCGTATCATTGCCGAAACGGGTGCTGGTCAGCACGGCGTAGCAACTGCTACCGTAGCAGCACTGTTCGGTATGGAATGTATAATCTATATGGGCGAAGAA…
2	WT-100-1-C	WT-100-1	12	7	G3D, A20T, M32I, D47N, R60H, L76M, A118V, V127I, N176S, K268R, E313V, N380S	WT TmTrpB	ATGAAAGACTACTTCGGTCCGTACGGTGGCCAGTACGTGCCGGAAATCCTGATGCCAACTCTGGAAGAACTGGAAGCTGCGTACGAAGAAATCATAAAAGATGAGTCTTTCTGGAAAGAATTCAATGACCTGCTGCGCAATTATGCGGGTCGCCCGACTCCGCTGTACTTCGCACGTCATCTGTCCGAAAAATACGGTGCTCGCATCTATCTGAAACGTGAAGACATGCTACATACTGGTGCGCATAAAATCAATAACGCTATCGGCCAGGTTCTGCTGGCAAAAAAAATGGGCAAAACCCGTATCATTGCTGAAACGGGTGCTGGTCAGCACGGCGTAGCAACTGCTACCGTAGCAGCGCTGTTCGGTATGGAATGTATAATCTATATGGGCGAAGAA…
2	WT-100-1-D	WT-100-1	12	9	G3D, A20T, M32I, R60H, L76M, A118V, V127I, K163E, N176S, K268R, E313V, N380S	WT TmTrpB	ATGAAAGACTACTTCGGTCCGTACGGTGGCCAGTACGTGCCGGAAATCCTGATGCCAACTCTGGAAGAACTGGAAGCTGCGTACGAAGAAATCATAAAAGATGAGTCTTTCTGGAAAGAATTCAATGACCTGCTGCGCGATTATGCGGGTCGCCCGACTCCGCTGTACTTCGCACGTCATCTGTCCGAAAAATACGGTGCTCGCATCTATCTGAAACGTGAAGACATGCTGCATACTGGTGCGCATAAAATCAATAACGCTATCGGCCAGGTTCTGCTGGCAAAAAAAATGGGCAAAACCCGTATCATTGCTGAAACGGGTGCTGGTCAGCATGGCGTAGCAACTGCTACCGTAGCAGCGCTGTTCGGTATGGAATGTATAATCTATATGGGCGAAGAA…
2	WT-100-1-E	WT-100-1	14	10	G3D, A20T, D47N, R60H, L76M, A118V, V127I, I195T, I196V, K268R, E313V, K316R, I341T, N380S	WT TmTrpB	ATGAAAGACTACTTCGGTCCGTACGGTGGCCAGTACGTGCCGGAAATCCTGATGCCAACTCTGGAAGAACTGGAAGCTGCGTACGAAGAAATCATGAAAGATGAGTCTTTCTGGAAAGAATTCAATGACCTGCTGCGCAACTATGCGGGTCGCCCGACTCCGCTGTACTTCGCACGTCATCTGTCCGAAAAATACGGTGCTCGCATCTATCTGAAACGTGAAGACATGCTACATACTGGTGCGCATAAAATCAATAACGCTATCGGCCAGGTTCTGCTGGCAAAAAAAATGGGCAAAACCCGTATCATTGCTGAAACGGGTGCTGGTCAGCACGGCGTAGCAACTGCTACCGTAGCAGCGCTGTTCGGTATGGAATGTATAATCTATATGGGCGAAGAA…
2	WT-100-1-F	WT-100-1	16	11	G3D, A20T, D47N, R60H, R68H, L76M, A118V, V127I, P140L, N176S, V250I, T259A, I271V, E313V, A351V, N380S	WT TmTrpB	ATGAAAGACTACTTCGGTCCGTACGGTGGCCAGTACGTGCCGGAAATCCTGATGCCAACTCTGGAAGAACTGGAAGCTGCGTACGAAGAAATCATGAAAGATGAGTCTTTCTGGAAAGAATTCAATGACCTGCTGCGCAATTATGCGGGTCGCCCGACTCCGCTGTACTTCGCACGTCATCTGTCCGAAAAATACGGTGCTCACATCTATCTGAAACGTGAAGACATGCTACATACTGGTGCGCATAAAATCAATAACGCTATCGGCCAGGTTCTGCTGGCAAAAAAAATGGGCAAAACCCGTATCATTGCTGAAACGGGTGCTGGTCAGCACGGCGTAGCAACTGCTACCGTAGCAGCGCTGTTCGGTATGGAATGTATAATCTATATGGGCGAAGAA…
2	WT-100-2-B	WT-100-2	7	9	G3D, E22K, F37L, W38R, L92P, K278R, S302P	WT TmTrpB	ATGAAAGACTACTTCGGTCCGTACGGTGGCCAGTACGTGCCGGAAATCCTGATGCCAGCTCTGAAAGAGCTGGAAGCTGCGTACGAAGAAATCATGAAAGATGAGTCTCTCCGGAAAGAATTCAACGACCTGCTACGCGACTATGCGGGTCGTCCGACTCCACTGTACTTCGCACGTCGTCTGTCCGAAAAATACGGTGCTCGCATCTATCTGAAACGTGAAGACCTGCTGCATACTGGTGCGCATAAAATCAATAACGCTATCGGCCAGGTTCCGCTGGCAAAAAAAATGGGCAAAACCCGTATCATTGCTGAAACGGGTGCTGGTCAGCACGGCGTAGCAACTGCTACCGCAGCAGCGCTGTTCGGTATGGAATGTGTAATCTATATGGGCGAAGAA…
2	WT-100-2-C	WT-100-2	7	5	G3D, E22K, F37L, W38R, L92P, T323A, V384A	WT TmTrpB	ATGAAAGACTACTTCGGTCCGTACGGTGGCCAGTACGTGCCGGAAATCCTGATGCCAGCTCTGAAAGAACTGGAAGCTGCGTACGAAGAAATCATGAAAGATGAGTCTCTCCGGAAAGAATTCAATGACCTGCTGCGCGATTATGCGGGTCGTCCGACTCCACTGTACTTCGCACGTCGTCTGTCCGAAAAATACGGTGCTCGCATCTATCTGAAACGTGAAGACCTGCTGCATACTGGTGCGCATAAAATCAATAACGCTATCGGCCAGGTTCCGCTGGCAAAAAAAATGGGCAAAACCCGTATCATTGCTGAAACGGGTGCTGGTCAGCACGGCGTAGCAACTGCTACCGCAGCAGCGCTGTTCGGTATGGAATGTGTAATCTATATGGGCGAAGAA…
2	WT-100-2-D	WT-100-2	9	8	A20T, F37L, W38R, F57Y, L92P, K209R, I212V, I223T, K278R	WT TmTrpB	ATGAAAGGCTACTTCGGTCCGTACGGTGGCCAGTACGTGCCGGAAATCCTGATGCCAACTCTGGAAGAACTGGAAGCTGCGTACGAAGAAATCATGAAAGATGAGTCTCTCCGGAAAGAATTCAATGACCTGCTGCGCGATTATGCGGGTCGTCCGACTCCGCTGTACTACGCACGTCGTCTGTCCGAAAAATACGGTGCTCGCATCTATCTGAAACGTGAAGACCTGCTGCATACTGGTGCGCATAAAATCAACAACGCTATCGGCCAGGTTCCGCTGGCAAAAAAAATGGGCAAAACCCGTATCATTGCTGAAACGGGTGCTGGTCAGCACGGCGTAGCAACTGCTACCGCAGCAGCGCTGTTCGGTATGGAATGTGTAATCTATATGGGCGAAGAA…
2	WT-100-2-E	WT-100-2	8	9	G3D, E22K, F37L, W38R, L92P, Y182C, Y222H, F240L	WT TmTrpB	ATGAAAGACTACTTCGGTCCGTACGGTGGCCAGTACGTGCCGGAAATCCTGATGCCAGCTCTGAAAGAACTGGAAGCTGCGTACGAAGAAATCATGAAAGATGAGTCTCTCCGGAAAGAATTCAATGACCTGCTGCGCGATTATGCGGGCCGTCCGACTCCACTGTACTTCGCACGTCGTCTGTCCGAAAAATACGGTGCTCGCATCTATCTGAAACGTGAAGACCTGCTGCATACTGGTGCGCATAAAATCAATAACGCTATCGGCCAGGTTCCGCTGGCAAAAAAAATGGGCAAAACCCGTATCATTGCTGAAACGGGTGCTGGTCAGCACGGTGTAGCAACTGCTACCGCAGCAGCGCTGTTCGGTATGGAATGTGTAATCTATATGGGCGAAGAA…
2	WT-100-2-F	WT-100-2	9	10	E22K, F37L, W38R, L92P, G131R, I212V, I223T, I248T, S302P	WT TmTrpB	ATGAAAGGCTACTTCGGTCCGTACGGTGGCCAGTACGTGCCGGAAATCCTGATGCCAGCTCTGAAAGAACTGGAAGCTGCGTACGAAGAAATCATGAAAGATGAGTCTCTCCGGAAAGAATTCAATGACCTGCTGCGCGATTATGCGGGCCGTCCGACTCCACTGTACTTCGCACGTCGTCTGTCCGAAAAATACGGTGCTCGCATCTACCTGAAACGTGAAGACCTACTGCATACTGGTGCGCATAAAATCAATAACGCTATCGGCCAGGTTCCGCTGGCAAAAAAAATGGGCAAAACCCGTATCATTGCTGAAACGGGTGCTGGTCAGCACGGCGTAGCAACTGCTACCGCAGCAGCGCTGTTCGGTATGGAATGTGTAATCTATATGCGCGAAGAA…
2	WT-100-2-G	WT-100-2	7	6	G3D, E22K, F37L, W38R, L92P, V250A, S368P	WT TmTrpB	ATGAAAGACTACTTCGGTCCGTACGGTGGCCAGTACGTGCCGGAAATCCTGATGCCAGCTCTGAAAGAACTGGAAGCTGCGTACGAAGAAATCATGAAAGATGAGTCTCTCCGGAAAGAATTCAATGACCTGCTGCGCGATTATGCGGGTCGTCCGACTCCGCTGTACTTCGCACGTCGTCTGTCCGAAAAATACGGTGCTCGCATCTATCTGAAACGTGAAGACCTGCTGCATACTGGTGCGCATAAAATCAACAACGCTATCGGCCAGGTTCCGCTGGCAAAAAAAATGGGCAAAACCCGTATCATTGCTGAAACGGGTGCTGGTCAGCACGGTGTAGCAACTGCTACCGCAGCAGCGCTGTTCGGTATGGAATGTGTAATCTATATGGGCGAAGAA…
2	WT-100-2-H	WT-100-2	9	9	G3D, E22K, E29G, F37L, W38R, K64E, L92P, W286C, V384A	WT TmTrpB	ATGAAAGACTACTTCGGTCCGTACGGTGGCCAGTACGTGCCGGAAATCCTGATGCCAGCTCTGAAAGAACTGGAAGCTGCGTACGGAGAAATCATGAAAGATGAGTCTCTCCGGAAAGAATTCAATGACCTGCTGCGCGATTATGCGGGTCGCCCGACTCCGCTGTACTTCGCACGTCGTCTGTCCGAAGAATACGGTGCTCGCATCTATCTGAAACGTGAAGACCTGCTGCATACTGGTGCACATAAAATCAATAACGCTATCGGCCAGGTTCCGCTGGCAAAAAAAATGGGCAAAACCCGTATCATTGCTGAAACGGGTGCTGGTCAGCACGGCGTAGCAACTGCTACCGCAGCAGCGCTGTTCGGTATGGAATGTGTAATCTATATGGGCGAAGAA…
2	WT-100-2-I	WT-100-2	10	5	G3D, E22K, F37L, W38R, L76P, I88T, L92P, S302P, H381Q, V384A	WT TmTrpB	ATGAAAGACTACTTCGGTCCGTACGGTGGCCAGTACGTGCCGGAAATCCTGATGCCAGCTCTGAAAGAACTGGAAGCTGCGTACGAAGAAATCATGAAAGATGAGTCTCTCCGGAAAGAATTCAATGACCTGCTGCGCGATTATGCGGGTCGTCCGACTCCGCTGTACTTCGCACGTCGTCTGTCCGAAAAATACGGTGCTCGCATCTATCTGAAACGTGAAGACCCGCTGCATACTGGTGCGCATAAAATCAATAACGCTACCGGCCAGGTTCCGCTGGCAAAAAAAATGGGCAAAACCCGTATCATTGCTGAAACGGGTGCTGGTCAGCACGGCGTAGCAACTGCTACCGCAGCAGCGCTGTTCGGTATGGAATGTGTAATCTATATGGGCGAAGAA…
2	WT-003-1-B	WT-003-1	6	2	A20V, K39E, A118T, V197I, T279S, F280L	WT TmTrpB	ATGAAAGGCTACTTCGGTCCGTACGGTGGCCAGTACGTGCCGGAAATCCTGATGCCAGTTCTGGAAGAACTGGAAGCTGCGTACGAAGAAATCATGAAAGATGAGTCTTTCTGGGAAGAATTCAATGACCTGCTGCGCGATTATGCGGGTCGTCCGACTCCGCTGTACTTCGCACGTCGTCTGTCCGAAAAATACGGTGCTCGCATCTATCTGAAACGTGAAGACCTGCTGCATACTGGTGCGCATAAAATCAATAACGCTATCGGCCAGGTTCTGCTGGCAAAAAAAATGGGCAAAACCCGTATCATTGCTGAAACGGGTGCTGGTCAGCACGGCGTAGCAACTGCTACCACAGCAGCGCTGTTCGGTATGGAATGTGTAATCTATATGGGCGAAGAA…
2	WT-003-1-C	WT-003-1	7	5	A20V, A118T, T279S, F280L, Y319C, I356T, K361R	WT TmTrpB	ATGAAAGGCTACTTCGGTCCGTACGGTGGCCAGTACGTGCCGGAAATCCTGATGCCAGTTCTGGAAGAACTGGAAGCTGCGTACGAAGAAATCATGAAAGATGAGTCTTTCTGGAAAGAATTCAATGACCTGCTGCGCGATTATGCGGGTCGTCCGACTCCGCTGTACTTCGCACGTCGTCTGTCCGAAAAATACGGTGCTCGCATCTATCTGAAACGTGAAGACCTGCTGCATACTGGTGCGCATAAAATCAATAACGCTATCGGCCAGGTTCTGCTGGCAAAAAAAATGGGCAAAACCCGTATCATTGCTGAAACGGGTGCTGGTCAGCACGGCGTAGCAACTGCTACCACAGCAGCGCTGTTCGGTATGGAATGTGTAATCTATATGGGCGAAGAA…
2	WT-003-1-D	WT-003-1	7	7	A20V, T115S, A118T, I136V, T279S, F280L, Y319C	WT TmTrpB	ATGAAAGGCTACTTCGGTCCGTACGGTGGCCAGTACGTGCCGGAAATCCTGATGCCAGTTCTGGAAGAACTGGAAGCTGCGTACGAAGAAATCATGAAAGATGAGTCTTTCTGGAAAGAATTCAATGACCTGCTGCGCGATTATGCGGGTCGTCCGACTCCGCTGTACTTCGCACGTCGTCTGTCCGAAAAATACGGTGCTCGCATCTACCTGAAACGTGAAGACCTGCTGCATACTGGTGCGCATAAAATCAATAACGCTATCGGCCAGGTTCTGCTGGCAAAAAAAATGGGCAAAACCCGTATCATTGCTGAAACGGGTGCTGGTCAGCACGGCGTAGCAAGTGCTACCACAGCAGCGCTGTTCGGTATGGAATGTGTAATCTATATGGGCGAAGAA…
2	WT-003-1-E	WT-003-1	10	8	V13M, A20V, Y28H, D47G, T115S, A118T, G249D, T279S, F280L, Y319C	WT TmTrpB	ATGAAAGGCTACTTCGGTCCGTATGGTGGCCAGTACATGCCGGAAATCCTGATGCCAGTTCTGGAAGAACTGGAAGCTGCTCACGAAGAAATCATGAAAGATGAGTCTTTCTGGAAAGAATTCAATGACCTGCTGCGCGGTTATGCGGGTCGTCCGACTCCGCTGTACTTCGCACGTCGTCTGTCCGAAAAATACGGTGCTCGCATCTATCTGAAACGTGAAGACCTGCTGCATACTGGTGCGCATAAAATCAATAACGCTATCGGCCAGGTTCTGCTGGCAAAAAAAATGGGCAAAACCCGTATCATTGCTGAAACGGGTGCTGGTCAGCACGGCGTAGCAAGTGCTACCACAGCAGCGCTGTTCGGTATGGAATGTGTAATCTATATGGGCGAAGAA…
2	WT-003-1-F	WT-003-1	8	4	A20V, V91A, A118T, V197I, K268R, T279S, F280L, Q283*	WT TmTrpB	ATGAAAGGCTACTTCGGTCCGTACGGTGGCCAGTACGTGCCGGAAATCCTGATGCCAGTTCTGGAAGAACTGGAAGCTGCGTACGAAGAAATCATGAAAGATGAGTCTTTCTGGAAAGAATTCAATGACCTGCTGCGCGATTATGCGGGTCGTCCGACTCCGCTGTACTTCGCACGTCGTCTGTCCGAAAAATACGGTGCTCGCATCTATCTGAAACGTGAAGACCTGCTGCATACTGGTGCGCATAAAATCAATAACGCTATCGGCCAGGCTCTGCTGGCAAAAAAAATGGGCAAAACCCGTATCATTGCTGAAACGGGTGCTGGTCAGCACGGCGTAGCAACTGCTACCACAGCAGCGCTGTTCGGTATGGAATGTGTAATCTATATGGGCGAAGAA…
2	WT-003-1-G	WT-003-1	9	4	A20V, M32T, A118T, R218C, I241N, T259A, G260D, T279S, F280L	WT TmTrpB	ATGAAAGGCTACTTCGGTCCGTACGGTGGCCAGTACGTGCCGGAAATCCTGATGCCAGTTCTGGAAGAACTGGAAGCTGCGTACGAAGAAATCACGAAAGATGAGTCTTTCTGGAAAGAATTCAATGACCTGCTGCGCGATTATGCGGGTCGTCCGACTCCGCTGTACTTCGCACGTCGTCTGTCCGAAAAATACGGTGCTCGCATCTATCTGAAACGTGAAGACCTGCTGCATACTGGTGCGCATAAAATCAATAACGCTATCGGCCAGGTTCTGCTGGCAAAAAAAATGGGCAAAACCCGTATCATTGCTGAAACGGGTGCTGGTCAGCACGGCGTAGCAACCGCTACCACAGCAGCGCTGTTCGGTATGGAATGTGTAATCTATATGGGCGAAGAA…
2	WT-003-1-H	WT-003-1	8	4	A20V, A118T, G230C, K261E, T279S, F280L, I356V, N357Y	WT TmTrpB	ATGAAAGGCTACTTCGGTCCGTACGGTGGCCAGTACGTGCCGGAAATCCTGATGCCAGTTCTGGAAGAACTGGAAGCTGCGTACGAAGAAATCATGAAAGATGAGTCTTTCTGGAAAGAATTCAATGACCTGCTGCGCGATTATGCGGGTCGTCCGACTCCGCTGTACTTCGCACGTCGTCTGTCCGAAAAATACGGTGCTCGCATCTATCTGAAACGTGAAGACCTGCTGCATACTGGTGCGCATAAAATCAATAACGCTATCGGCCAGGTTCTGCTGGCAAAAAAAATGGGCAAAACCCGTATCATTGCTGAAACGGGTGCTGGTCAGCACGGCGTAGCAACTGCTACCACAGCAGCGCTGTTCGGTATGGAATGTGTAATCTATATGGGCGAAGAA…
2	WT-003-1-I	WT-003-1	8	6	A20V, T106A, A118T, V188I, S277F, T279S, F280L, I356T	WT TmTrpB	ATGAAAGGCTACTTCGGTCCGTACGGTGGCCAGTACGTGCCGGAAATCCTGATGCCAGTTCTGGAAGAACTGGAAGCTGCGTACGAAGAAATCATGAAAGATGAGTCTTTCTGGAAAGAATTCAATGACCTGCTGCGCGATTATGCGGGTCGTCCGACTCCGCTGTACTTCGCACGTCGTCTGTCCGAAAAATACGGTGCTCGCATCTACCTGAAACGTGAAGACCTGCTGCATACTGGTGCGCATAAAATCAATAACGCTATCGGCCAGGTTCTGTTGGCAAAAAAAATGGGCAAAACCCGTATCATTGCTGAAGCGGGTGCTGGTCAGCACGGCGTAGCAACTGCTACCACAGCAGCGCTGTTCGGTATGGAATGTGTAATCTATATGGGCGAAGAA…
2	Q90*-003-1-C	Q90*-003-1	10	6	Y8H, A20P, E22K, *90Q, M97T, N167D, C226S, S243P, S302P, S335P, Y383H	TmTripleQ90*	ATGAAAGGCTACTTCGGTCCGCACGGTGGCCAGTACGTGCCAGAAATCCTGATGGGACCTCTGAAAGAACTGGAAGCTGCGTACGAAGAAATCATGAAAGATGAGTCTTTCTGGAAAGAATTCAATGACCTGCTACGCGATTATGCGGGTCGTCCGACTCCGCTGTACTTCGCACGTCGTCTGTCCGAAAAATACGGTGCTCGCGTATATCTGAAACGTGAAGACCTGCTGCATACTGGTGCGCATAAAATCAATAACGCTATCGGCCAGGTTCTGCTGGCAAAAAAAACGGGCAAAACCCGTATCATTGCTGAAACGGGTGCTGGTCAGCACGGCGTAGCAACTGCTACCGCAGCAGCGCTGTTCGGTATGGAATGTGTGATCTATATGGGCGAAGAA…
2	Q90*-003-1-D	Q90*-003-1	11	9	Y8H, M18V, A20P, R59S, *90Q, K95R, M97T, N167D, S243P, S302P, S335P, E376G	TmTripleQ90*	ATGAAAGGCTACTTCGGTCCGCACGGTGGCCAGTACGTGCCAGAAATCCTGGTGGGACCTCTGGAAGAACTGGAAGCTGCGTACGAAGAAATCATGAAAGATGAGTCTTTCTGGAAAGAATTCAATGACCTGCTACGCGATTATGCGGGTCGTCCGACTCCGCTGTACTTCGCAAGTCGTCTGTCCGAAAAATACGGTGCTCGCGTATATCTGAAGCGTGAAGACCTGCTGCATACTGGTGCGCATAAAATCAATAACGCTATCGGCCAGGTTCTGCTGGCAAGAAAAACGGGCAAAACCCGTATCATTGCTGAAACGGGTGCTGGTCAGCACGGCGTAGCAACTGCTACCGCAGCAGCGCTGTTCGGTATGGAATGTGTGATCTATATGGGCGAAGAA…
2	Q90*-003-1-E	Q90*-003-1	14	8	Y8H, A20P, *90Q, K95R, M97T, G98D, I136T, N167D, E168K, I174V, S243P, W286R, S302P, S335P, E376G	TmTripleQ90*	ATGAAAGGATACTTCGGTCCGCACGGTGGCCAGTACGTGCCAGAAATCCTGATGGGACCTCTGGAAGAACTGGAAGCTGCGTACGAAGAAATCATGAAAGATGAGTCTTTCTGGAAAGAATTCAATGACCTGCTACGCGATTATGCGGGTCGTCCGACTCCGCTGTACTTCGCACGTCGTCTGTCCGAAAAATACGGTGCTCGCGTATATCTGAAACGTGAAGACCTGCTGCATACTGGTGCGCATAAAATCAATAACGCTATCGGCCAGGTTCTGCTGGCAAGAAAAACGGACAAAACCCGTATCATTGCTGAAACGGGTGCTGGTCAGCACGGCGTAGCAACTGCTACCGCAGCAGCGCTGTTCGGTATGGAATGTGTGATCTATATGGGCGAAGAA…
2	Q90*-003-1-F	Q90*-003-1	14	8	Y8H, A20P, *90Q, K95R, M97T, I136T, N167D, Y193C, K215E, F240L, S243P, S302P, S335P, K361E, E376G	TmTripleQ90*	ATGAAAGGCTACTTCGGTCCGCACGGTGGCCAGTACGTGCCAGAAATCCTGATGGGACCTCTGGAAGAACTGGAAGCTGCGTACGAAGAAATCATGAAAGATGAGTCTTTCTGGAAAGAATTCAATGACCTGCTACGCGATTATGCGGGTCGTCCGACTCCGCTGTACTTCGCACGTCGTCTGTCCGAAAAATACGGTGCTCGCGTATATCTGAAACGTGAAGACCTGCTGCATACTGGTGCGCATAAAATCAATAACGCTATCGGCCAGGTTCTGCTGGCAAGAAAAACGGGCAAAACCCGTATCATTGCTGAAACGGGTGCTGGTCAGCACGGCGTAGCAACTGCTACCGCAGCAGCGCTGTTCGGTATGGAATGTGTGATCTATATGGGCGAAGAA…
2	Q90*-003-1-G	Q90*-003-1	16	6	Y8H, G10D, M18V, A20P, F57L, *90Q, M97T, I136T, N167D, I174V, V224I, S243P, K278R, S302P, S335P, E338G, E376G	TmTripleQ90*	ATGAAAGGCTACTTCGGTCCGCACGGTGACCAGTACGTGCCAGAAATCCTGGTGGGACCTCTGGAAGAACTGGAAGCTGCGTACGAAGAAATCATGAAAGATGAGTCTTTCTGGAAAGAATTCAATGACCTGCTACGCGATTATGCGGGTCGTCCGACTCCGCTGTACCTCGCACGTCGTCTGTCCGAAAAATACGGTGCTCGCGTATATCTGAAACGTGAAGACCTGCTGCATACTGGTGCGCATAAAATCAATAACGCTATCGGCCAGGTTCTGCTGGCAAAAAAAACGGGCAAAACCCGTATCATTGCTGAAACGGGTGCTGGTCAGCACGGCGTAGCAACTGCTACCGCAGCAGCGCTGTTCGGTATGGAATGTGTGATCTATATGGGCGAAGAA…
2	Q90*-003-1-H	Q90*-003-1	12	9	Y8H, A20P, G80D, *90Q, M97T, I136T, N167D, R171C, T208A, S243P, S294P, S302P, R385H	TmTripleQ90*	ATGAAAGGATACTTCGGTCCGCACGGTGGCCAGTACGTGCCAGAAATCCTGATGGGACCTCTGGAAGAACTGGAAGCTGCGTACGAAGAAATCATGAAAGATGAGTCTTTCTGGAAAGAATTCAATGACCTGCTACGCGATTATGCGGGTCGTCCGACTCCGCTGTACTTCGCACGTCGTCTGTCCGAAAAATACGGTGCTCGCGTATATCTGAAACGCGAAGACCTGCTGCATACTGATGCGCATAAAATCAATAACGCTATCGGCCAGGTTCTGCTGGCAAAAAAAACGGGCAAAACCCGTATCATTGCTGAAACGGGTGCTGGTCAGCACGGCGTAGCAACTGCTACCGCAGCAGCGCTGTTCGGTATGGAATGTGTGATCTATATGGGCGAAGAA…
2	Tri-003-1-D	Tri-003-1	9	4	E15K, A58T, K95R, A118V, N167D, I195V, K268E, I271V, A351V	TmTriple	ATGAAAGGCTACTTCGGTCCGTACGGTGGCCAGTACGTGCCAAAAATCCTGATGGGAGCTCTGGAAGAACTGGAAGCTGCGTACGAAGAAATCATGAAAGATGAGTCTTTCTGGAAAGAATTCAATGACCTGCTGCGCGATTATGCGGGTCGTCCGACTCCGCTGTACTTCACACGTCGTCTGTCCGAAAAATACGGTGCTCGCGTATATCTGAAACGTGAAGACCTGCTGCATACTGGTGCGCATAAAATCAATAACGCTATCGGCCAGGTTCTGCTGGCAAGAAAAATGGGCAAAACCCGTATCATTGCTGAAACGGGTGCTGGTCAGCACGGCGTAGCAACTGCTACCGTAGCAGCGCTGTTCGGTATGGAATGTGTAATCTATATGGGCGAAGAA…
2	Tri-003-1-E	Tri-003-1	7	5	E15K, A27V, A58T, K64E, N167D, A351V, V362A	TmTriple	ATGAAAGGCTACTTCGGTCCGTACGGTGGCCAGTACGTGCCAAAAATCCTGATGGGAGCTCTGGAAGAACTGGAAGCTGTGTACGAAGAAATCATGAAAGATGAGTCTTTCTGGAAAGAATTCAATGACCTGCTGCGCGATTATGCGGGTCGTCCGACTCCGCTGTACTTCACACGCCGTCTGTCCGAAGAATACGGTGCTCGCGTGTATCTGAAACGTGAAGACCTGTTGCATACTGGTGCGCATAAAATCAATAACGCTATCGGCCAGGTTCTGCTGGCAAAAAAAATGGGCAAAACCCGTATCATTGCTGAAACGGGTGCTGGTCAGCACGGCGTAGCAACTGCTACCGCAGCAGCGCTGTTCGGTATGGAATGTGTAATCTATATGGGCGAAGAA…
2	Tri-003-1-F	Tri-003-1	12	3	E15K, A27V, A58T, A118V, E143Q, E214G, V245A, K246R, I271V, F331L, A351V, H381Q	TmTriple	ATGAAAGGCTACTTCGGTCCGTACGGTGGCCAGTACGTGCCAAAAATCCTGATGGGAGCTCTGGAAGAACTGGAAGCTGTGTACGAAGAAATCATGAAAGATGAGTCTTTCTGGAAAGAATTCAATGACCTGCTGCGCGATTATGCGGGTCGTCCGACTCCGCTGTACTTCACACGTCGTCTGTCCGAAAAATACGGTGCTCGCGTATATCTGAAACGTGAAGACCTGCTGCATACTGGTGCGCACAAAATCAATAACGCTATCGGCCAGGTTCTGCTGGCAAAAAAAATGGGCAAAACCCGTATCATTGCTGAAACGGGTGCTGGTCAGCACGGCGTAGCAACTGCTACCGTAGCAGCGCTGTTCGGTATGGAATGTGTAATCTATATGGGCGAAGAA…
2	Tri-003-1-G	Tri-003-1	10	5	E15K, A27V, A58T, T79A, A118V, V245T, I271V, I332V, A351V, Y383C	TmTriple	ATGAAAGGCTACTTCGGTCCGTACGGTGGCCAGTACGTGCCAAAAATCCTGATGGGAGCTCTGGAAGAACTGGAAGCTGTGTACGAAGAAATCATGAAAGATGAGTCTTTCTGGAAAGAATTCAATGACCTGCTGCGCGATTATGCGGGTCGTCCGACTCCGCTGTACTTCACACGCCGTCTGTCCGAAAAATACGGTGCTCGCGTATATCTGAAACGTGAAGACCTGCTGCATGCTGGTGCGCATAAAATCAATAACGCTATCGGCCAGGTTCTGCTGGCAAAAAAAATGGGCAAAACCCGTATCATTGCTGAAACGGGTGCTGGTCAGCACGGCGTAGCAACTGCTACCGTAGCAGCGCTGTTCGGTATGGAATGTGTAATCTATATGGGCGAAGAA…
2	Tri-003-1-H	Tri-003-1	15	6	E15K, K33E, A58T, E74K, H111Q, A118V, F122S, N199S, V250I, E255K, T259A, I271V, A351V, V362A, V364M	TmTriple	ATGAAAGGCTACTTCGGTCCGTACGGTGGCCAGTACGTACCAAAAATCCTGATGGGAGCTCTGGAAGAACTGGAAGCTGCGTACGAAGAAATCATGGAAGATGAGTCTTTCTGGAAAGAATTCAATGACCTGCTGCGCGATTATGCGGGTCGTCCGACTCCGCTGTACTTCACACGTCGTCTGTCCGAAAAATACGGTGCTCGCGTATATCTGAAACGTAAAGACCTGCTGCATACTGGTGCGCATAAAATCAATAACGCTATCGGCCAGGTTCTGCTGGCAAAAAAAATGGGCAAAACCCGTATCATTGCTGAAACGGGTGCTGGTCAGCAAGGCGTAGCAACTGCTACCGTAGCAGCGCTGTCCGGTATGGAATGTGTAATCTATATGGGCGAAGAA…
2	Tri-003-1-I	Tri-003-1	6	4	E15K, A58T, I84V, Q110R, A118V, N199D	TmTriple	ATGAAAGGCTACTTCGGTCCGTACGGTGGCCAGTACGTGCCAAAAATCCTGATGGGAGCTCTGGAAGAACTGGAAGCTGCGTACGAAGAAATCATGAAAGATGAGTCTTTCTGGAAAGAATTCAATGACCTGCTGCGCGATTATGCGGGTCGTCCGACTCCGCTGTACTTCACACGCCGTCTGTCCGAAAAATACGGTGCTCGCGTATATCTGAAACGTGAAGACCTGCTGCATACTGGTGCGCATAAAGTCAACAACGCTATCGGCCAGGTTCTGCTGGCAAAAAAAATGGGCAAAACCCGTATCATTGCTGAAACGGGTGCTGGTCGGCACGGCGTAGCAACTGCTACCGTAGCAGCGCTGTTCGGCATGGAATGTGTAATCTATATGGGCGAAGAA…
2	Tri-003-2-B	Tri-003-2	8	11	E15K, M18L, A58T, A118V, V250I, T259A, I271V, A351V	TmTriple	ATGAAAGGCTACTTCGGTCCGTACGGTGGCCAGTACGTGCCAAAAATCCTGTTGGGAGCTCTGGAAGAACTGGAAGCTGCATACGAAGAAATCATGAAAGATGAGTCTTTCTGGAAAGAATTCAATGACCTGCTGCGCGATTATGCGGGTCGTCCGACTCCGCTGTACTTCACACGCCGTCTGTCCGAAAAATACGGTGCTCGCGTATATCTGAAGCGTGAAGACCTGCTGCATACTGGTGCGCATAAAATCAACAACGCTATCGGCCAGGTTCTGCTGGCAAAAAAAATGGGTAAAACCCGTATCATTGCTGAAACGGGTGCTGGTCAGCACGGTGTAGCAACTGCTACCGTAGCAGCGCTGTTCGGTATGGAATGTGTAATCTATATGGGCGAAGAA…
2	Tri-003-2-C	Tri-003-2	13	4	E15K, A27V, K33E, A58T, A118V, F122S, K209E, V250I, T259A, I271V, Y273C, I332V, A351V	TmTriple	ATGAAAGGCTACTTCGGTCCGTACGGTGGCCAGTACGTGCCAAAAATCCTGATGGGAGCTCTGGAAGAACTGGAAGCTGTGTACGAAGAAATCATGGAAGATGAGTCTTTCTGGAAAGAATTCAATGACCTGCTGCGCGATTATGCGGGTCGTCCGACTCCACTGTACTTCACACGCCGTCTGTCCGAAAAATACGGTGCTCGCGTATATCTGAAACGTGAAGACCTGCTGCATACTGGTGCGCATAAAATCAATAACGCTATCGGCCAGGTTCTGCTGGCAAAAAAAATGGGCAAAACCCGTATCATTGCTGAAACGGGTGCTGGTCAGCACGGCGTAGCAACTGCTACCGTAGCAGCGCTGTCCGGTATGGAGTGTGTAATCTATATGGGCGAAGAA…
2	Tri-003-2-D	Tri-003-2	12	8	E15K, A27V, A58T, A118V, F122S, N167D, V250I, T259A, I271V, A351V, I356V, I388N	TmTriple	ATGAAAGGCTACTTCGGTCCGTACGGTGGCCAGTACGTGCCAAAAATCCTGATGGGAGCTCTGGAAGAACTGGAAGCTGTGTACGAAGAAATCATGAAAGATGAGTCTTTCTGGAAAGAATTCAATGACCTGCTACGCGATTATGCGGGTCGTCCGACTCCGCTGTACTTCACACGCCGTCTGTCCGAAAAATACGGTGCTCGCGTATATCTGAAACGTGAAGACCTGCTGCATACTGGTGCGCATAAAATCAACAACGCTATCGGCCAGGTTCTGCTGGCAAAAAAAATGGGCAAGACCCGTATCATTGCTGAAACGGGTGCTGGTCAGCACGGCGTAGCAACTGCTACCGTAGCAGCGCTGTCCGGTATGGAATGTGTAATCTATATGGGCGAAGAA…
2	Tri-003-2-E	Tri-003-2	10	3	E15K, D47N, A58T, A118V, E143Q, I271V, K278R, F280L, F331L, A351V	TmTriple	ATGAAAGGCTACTTCGGTCCGTACGGTGGCCAGTACGTGCCAAAAATCCTGATGGGAGCTCTGGAAGAACTGGAAGCTGCGTACGAAGAAATCATGAAAGATGAGTCTTTCTGGAAAGAATTCAATGACCTGCTGCGCAATTATGCGGGTCGTCCGACTCCGCTGTACTTCACACGTCGTCTGTCCGAAAAATACGGTGCTCGCGTATATCTGAAGCGTGAAGACCTGCTGCATACTGGTGCGCATAAAATCAATAATGCTATCGGCCAGGTTCTGCTGGCAAAAAAAATGGGCAAAACCCGTATCATTGCTGAAACGGGTGCTGGTCAGCACGGCGTAGCAACTGCTACCGTAGCAGCGCTGTTCGGTATGGAATGTGTAATCTATATGGGCGAAGAA…
2	Tri-100-1-B	Tri-100-1	5	5	E22K, T117A, F240S, A252P, Y383H	TmTriple	ATGAAAGGCTACTTCGGTCCGTACGGTGGCCAGTATGTGCCAGAAATCCTGATGGGAGCTCTGAAAGAACTGGAAGCTGCGTACGAAGAAATCATGAAAGATGAGTCTTTCTGGAAAGAATTCAATGACCTGCTGCGCGATTATGCGGGTCGTCCGACTCCGCTGTACTTCGCACGTCGTCTGTCCGAAAAATACGGTGCTCGCGTATATCTGAAACGTGAAGACCTGCTGCATACTGGTGCGCATAAAATCAATAACGCTATCGGCCAGGTTCTGCTGGCAAAAAAAATGGGCAAAACCCGTATCATTGCTGAAACGGGTGCTGGTCAGCACGGCGTAGCAACTGCTGCCGCAGCAGCGCTGTTCGGTATGGAATGTGTAATCTATATGGGCGAAGAA…
2	Tri-100-1-C	Tri-100-1	6	5	E22K, K39G, A58T, A116T, T117A, G217D	TmTriple	ATGAAAGGCTACTTCGGTCCGTACGGTGGCCAGTATGTGCCAGAAATCCTGATGGGAGCTCTGAAAGAACTGGAAGCTGCGTACGAAGAAATCATGAAAGATGAGTCTTTCTGGGGAGAATTCAATGACCTGCTGCGCGATTATGCGGGTCGTCCGACTCCGCTGTACTTCACACGTCGTCTGTCCGAAAAATACGGTGCTCGCGTATATCTGAAACGTGAAGACCTGCTGCATACTGGTGCGCATAAAATCAATAACGCTATCGGCCAGGTTCTGTTGGCAAAAAAAATGGGCAAAACCCGTATCATTGCTGAAACGGGTGCTGGTCAGCACGGCGTAGCAACTACTGCCGCAGCAGCGCTGTTCGGTATGGAATGTGTAATCTATATGGGCGAAGAA…
2	Tri-100-1-D	Tri-100-1	9	6	E22K, G50S, Y65H, K95R, T117A, A118T, V203I, A225V, H381Q	TmTriple	ATGAAAGGCTACTTCGGTCCGTACGGTGGCCAGTATGTGCCAGAAATCCTGATGGGAGCTCTGAAAGAACTGGAAGCTGCGTACGAAGAAATCATGAAAGATGAGTCTTTCTGGAAAGAGTTCAATGACCTGCTGCGCGATTATGCGAGTCGTCCGACTCCGCTGTACTTCGCACGTCGTCTGTCCGAAAAACACGGTGCTCGCGTATATCTGAAACGTGAAGACCTGCTGCATACTGGTGCGCATAAAATCAATAACGCTATCGGCCAGGTTCTGCTGGCAAGAAAAATGGGCAAAACCCGTATCATTGCTGAAACGGGTGCTGGTCAGCACGGCGTAGCAACTGCTGCCACAGCAGCGCTGTTCGGTATGGAATGTGTAATCTATATGGGCGAAGAA…
2	Tri-100-1-E	Tri-100-1	10	8	P14S, E22K, A58V, K95R, H111Q, T117A, V203I, K215E, I271T, A321T	TmTriple	ATGAAAGGCTACTTCGGTCCGTACGGTGGCCAGTATGTGTCAGAAATCCTGATGGGAGCTCTGAAAGAACTGGAAGCTGCATACGAAGAAATCATGAAAGATGAGTCTTTCTGGAAAGAATTCAATGACCTGCTGCGCGATTATGCGGGTCGTCCGACTCCGCTGTACTTCGTACGTCGTCTGTCCGAAAAATACGGTGCTCGCGTATATCTGAAACGTGAAGACCTGCTGCATACTGGTGCGCATAAAATCAATAACGCTATCGGCCAGGTTCTGCTGGCAAGAAAAATGGGCAAAACCCGTATCATTGCTGAAACGGGTGCTGGTCAGCAAGGCGTAGCAACTGCTGCCGCAGCAGCGCTGTTCGGCATGGAATGCGTAATCTATATGGGCGAAGAA…
2	Tri-100-1-F	Tri-100-1	7	2	E22K, F41L, K95R, T117A, V203I, A234T, G276D	TmTriple	ATGAAAGGCTACTTCGGTCCGTACGGTGGCCAGTATGTGCCAGAAATCCTGATGGGAGCTCTGAAAGAACTGGAAGCTGCGTACGAAGAAATCATGAAAGATGAGTCTTTCTGGAAAGAACTCAATGACCTGCTGCGCGATTATGCGGGTCGTCCGACTCCGCTGTACTTCGCACGTCGTCTGTCCGAAAAATACGGTGCTCGCGTATATCTGAAACGTGAAGACCTGCTGCATACTGGTGCGCATAAAATCAATAACGCTATCGGCCAGGTTCTGCTGGCAAGAAAAATGGGCAAAACCCGTATCATTGCTGAAACGGGTGCTGGTCAGCACGGCGTAGCAACTGCTGCCGCAGCAGCGCTGTTCGGTATGGAATGTGTAATCTATATGGGCGAAGAA…
2	Tri-100-1-G	Tri-100-1	6	5	E22K, K95R, T117A, Y182H, S346P, H381Q	TmTriple	ATGAAAGGCTACTTCGGTCCGTACGGTGGCCAGTATGTGCCAGAAATCCTGATGGGAGCTCTGAAAGAACTGGAAGCTGCGTACGAAGAAATCATGAAAGATGAGTCTTTCTGGAAAGAATTCAATGACCTGCTGCGCGATTATGCGGGTCGTCCGACTCCGCTGTACTTCGCACGTCGTCTGTCCGAAAAATACGGTGCTCGCGTATATCTGAAACGTGAAGACCTGCTGCATACTGGTGCGCATAAAATCAATAACGCTATCGGCCAGGTTCTGCTGGCAAGAAAAATGGGCAAAACCCGTATCATTGCTGAAACGGGTGCTGGTCAGCACGGCGTAGCAACTGCTGCCGCAGCAGCGCTGTTCGGCATGGAATGTGTAATCTATATGGGCGAAGAA…
2	Tri-100-1-H	Tri-100-1	8	4	E22K, K95R, T117A, G217D, S231P, R312C, E333G, L350Q	TmTriple	ATGAAAGGCTACTTCGGTCCGTACGGTGGCCAGTATGTGCCAGAAATCCTGATGGGAGCTCTGAAAGAACTGGAAGCTGCGTACGAAGAAATCATGAAAGATGAGTCTTTCTGGAAAGAATTCAATGACCTGCTGCGCGATTATGCGGGTCGTCCGACTCCGCTGTACTTCGCACGTCGTCTGTCCGAAAAATACGGTGCTCGCGTATATCTGAAACGTGAAGACCTGCTGCATACTGGTGCGCATAAAATCAATAACGCTATCGGCCAGGTTCTGCTGGCAAGAAAAATGGGCAAAACCCGTATCATTGCTGAAACGGGTGCTGGTCAGCACGGCGTAGCAACTGCTGCCGCAGCAGCGCTATTCGGTATGGAATGTGTAATCTATATGGGCGAAGAA…
2	Tri-100-2-C	Tri-100-2	8	5	Y8H, E15G, A58T, A119T, N167D, I195T, W286R, I388T	TmTriple	ATGAAAGGCTACTTCGGACCGCACGGTGGCCAGTACGTGCCAGGAATCCTGATGGGAGCTCTGGAAGAACTGGAAGCTGCGTACGAAGAAATCATGAAAGATGAGTCTTTCTGGAAAGAATTCAATGACCTGCTGCGCGATTATGCGGGTCGTCCGACTCCGCTGTACTTCACACGTCGTCTGTCCGAAAAATACGGTGCTCGCGTATATCTGAAACGTGAAGACCTGCTGCATACTGGTGCGCATAAAATCAACAACGCTATCGGCCAGGTTCTGCTGGCAAAAAAAATGGGCAAAACCCGTATCATTGCTGAAACGGGTGCTGGTCAGCACGGCGTAGCAACTGCTACCGCAACAGCGCTGTTCGGTATGGAATGTGTAATCTATATGGGCGAAGAA…
2	Tri-100-2-D	Tri-100-2	10	15	Y8H, F57L, A58I, K64E, A119T, N167D, I195T, Y310H, E333G, I388T	TmTriple	ATGAAAGGCTACTTCGGACCGCACGGGGGCCAGTACGTGCCAGAAATCCTGATGGGAGCTCTGGAAGAACTGGAAGCTGCGTACGAAGAAATCATGAAAGATGAGTCTTTCTGGAAAGAATTCAATGACCTGCTACGCGATTATGCGGGTCGTCCGACTCCGCTGTACCTCATACGTCGTCTGTCCGAAGAATACGGTGCTCGCGTATATCTGAAACGTGAAGACCTGCTGCATACTGGTGCGCATAAAATCAACAACGCTATCGGCCAGGTTCTGCTGGCAAAAAAAATGGGCAAAACCCGTATCATTGCTGAAACGGGTGCTGGTCAACACGGCGTAGCAACTGCTACCGCAACAGCGCTGTTCGGCATGGAATGTGTAATCTATATGGGCGAAGAA…
2	Tri-100-2-E	Tri-100-2	13	10	Y8H, M18V, L45P, F57S, K95R, A119T, E132K, N167D, L177Q, I195T, G244D, Y310H, E333G	TmTriple	ATGAAAGGCTACTTCGGACCGCACGGTGGCCAGTACGTGCCAGAAATCCTGGTGGGAGCTCTGGAAGAACTGGAAGCTGCGTACGAAGAAATCATGAAAGATGAGTCTTTCTGGAAAGAATTCAATGACCTGCCGCGCGATTATGCGGGTCGTCCGACTCCGCTGTACTCCGCACGTCGTCTGTCCGAAAAATACGGTGCTCGCGTATATCTGAAACGTGAAGACCTGCTGCATACTGGTGCGCATAAAATCAACAACGCTATCGGCCAGGTTCTGCTGGCAAGAAAAATGGGCAAAACCCGTATCATTGCTGAAACGGGTGCTGGTCAGCACGGCGTAGCAACTGCTACCGCAACAGCGCTGTTCGGCATGGAATGTGTAATCTATATGGGCAAAGAA…
2	Tri-100-2-F	Tri-100-2	9	10	Y8H, A58T, A119T, N167D, I195T, A225T, Y310H, E333G, I388T	TmTriple	ATGAAAGGCTACTTCGGACCGCACGGTGGCCAGTACGTGCCAGAAATCCTGATGGGAGCTCTGGAAGAACTGGAAGCTGCGTACGAAGAAATCATGAAAGATGAGTCTTTCTGGAAAGAATTCAATGACCTGCTGCGCGATTATGCGGGTCGTCCGACTCCGCTGTACTTCACACGTCGTCTGTCCGAAAAATACGGTGCTCGCGTATATCTGAAACGTGAAGACCTGCTGCATACTGGTGCGCATAAAATCAACAACGCTATCGGCCAGGTTCTGCTGGCAAAAAAAATGGGCAAAACCCGTATCATTGCTGAAACGGGTGCTGGACAGCACGGTGTAGCAACTGCTACCGCAACAGCGCTGTTCGGCATGGAATGTGTAATCTATATGGGCGAAGAA…
2	Tri-100-2-G	Tri-100-2	9	15	Y8H, E15G, A119T, N167D, R171C, I195T, Y273C, K361E, I388T	TmTriple	ATGAAAGGCTACTTCGGACCGCACGGTGGCCAGTACGTGCCAGGAATCCTGATGGGAGCTCTGGAAGAACTGGAAGCTGCGTACGAAGAAATCATGAAAGATGAGTCTTTCTGGAAAGAGTTCAATGACCTGCTGCGCGATTATGCGGGTCGTCCGACTCCGCTGTACTTCGCACGTCGTCTGTCCGAAAAATACGGTGCTCGCGTATATCTGAAACGTGAAGACCTGCTGCATACTGGTGCGCATAAAATCAACAACGCTATCGGCCAGGTTCTGCTGGCAAAAAAAATGGGCAAAACCCGTATCATTGCTGAAACGGGTGCTGGACAGCACGGTGTAGCAACTGCTACCGCAACAGCACTGTTCGGCATGGAATGTGTAATCTATATGGGCGAAGAA…
2	Tri-100-2-H	Tri-100-2	10	10	Y8H, A27T, A58T, A119T, G123D, N167D, Y193*, I195T, L257P, I388T	TmTriple	ATGAAAGGCTACTTCGGACCGCACGGTGGCCAGTACGTGCCAGAAATCCTGATGGGAGCTCTGGAAGAACTGGAAGCTACGTACGAAGAAATCATGAAAGATGAGTCTTTCTGGAAAGAATTCAATGACCTGCTGCGCGATTATGCGGGTCGTCCGACTCCGCTGTACTTCACACGTCGTCTGTCCGAAAAATACGGTGCTCGCGTATATCTGAAACGTGAAGACCTGCTGCATACTGGTGCGCATAAAATCAACAACGCTATCGGCCAGGTTCTACTGGCAAAAAAAATGGGCAAAACCCGTATCATTGCTGAAACGGGTGCTGGTCAGCACGGCGTAGCAACTGCTACCGCAACAGCGCTGTTCGACATGGAATGTGTAATCTACATGGGCGAAGAA…
2	Tri-100-2-I	Tri-100-2	13	4	E22K, K95R, G98D, T117A, I136V, R171L, I174T, V203A, C226S, I248V, D284G, K359E, Y383C	TmTriple	ATGAAAGGCTACTTCGGTCCGTACGGTGGCCAGTATGTGCCAGAAATCCTGATGGGAGCTCTGAAAGAACTGGAAGCTGCGTACGAAGAAATCATGAAAGATGAGTCTTTCTGGAAAGAATTCAATGACCTGCTGCGCGATTATGCGGGTCGTCCGACTCCGCTGTACTTCGCACGTCGTCTGTCCGAAAAATACGGTGCTCGCGTATATCTGAAACGTGAAGACCTGCTGCATACTGGTGCGCATAAAATCAATAACGCTATCGGCCAGGTTCTGCTGGCAAGAAAAATGGACAAAACCCGTATCATTGCTGAAACGGGTGCTGGTCAGCACGGCGTAGCAACTGCTGCCGCAGCAGCGCTGTTCGGCATGGAATGTGTAATCTATATGGGCGAAGAA…
2	Tri-100-3-B	Tri-100-3	7	3	K39E, D47N, K95_K96insK, T117A, K210R, V227M, K270E	TmTriple	ATGAAAGGCTACTTCGGTCCGTACGGTGGCCAGTACGTGCCAGAAATCCTGATGGGAGCTCTGGAAGAACTGGAAGCTGCGTACGAAGAAATCATGAAAGATGAGTCTTTCTGGGAAGAATTCAATGACCTGCTGCGCAATTATGCGGGTCGTCCGACTCCGCTGTACTTCGCACGTCGTCTGTCCGAAAAATACGGTGCTCGCGTATATCTGAAACGTGAAGACCTGCTGCATACTGGTGCGCATAAAATCAATAACGCTATCGGCCAGGTTCTGCTGGCAAAAAAAAAAATGGGCAAAACCCGTATCATTGCTGAAACGGGTGCTGGTCAGCACGGCGTAGCAACTGCTGCCGCAGCAGCGCTGTTCGGTATGGAATGTGTAATCTATATGGGCGAA…
2	Tri-100-3-C	Tri-100-3	6	3	K39E, K95_K96insK, T117A, K210R, V227M, K270E	TmTriple	ATGAAAGGCTACTTCGGTCCGTACGGTGGCCAGTACGTGCCAGAAATCCTGATGGGAGCTCTGGAAGAACTGGAAGCTGCGTACGAAGAAATCATGAAAGATGAGTCTTTCTGGGAAGAATTCAATGACCTGCTGCGCGATTATGCGGGTCGTCCGACTCCGCTGTACTTCGCACGTCGTCTGTCCGAAAAATACGGTGCTCGCGTATATCTGAAACGTGAAGACCTGCTGCATACTGGTGCGCATAAAATCAATAACGCTATCGGCCAGGTTCTGCTGGCAAAAAAAAAAATGGGCAAAACCCGTATCATTGCTGAAACGGGTGCTGGTCAGCACGGCGTAGCAACTGCTGCCGCAGCAGCGCTGTTCGGTATGGAATGTGTAATCTATATGGGCGAA…
2	Tri-100-3-D	Tri-100-3	8	4	A27T, K39E, I88T, T117A, K210R, V227M, K270E, N380D	TmTriple	ATGAAAGGCTACTTCGGTCCGTACGGTGGCCAGTACGTGCCAGAAATCCTGATGGGAGCTCTGGAAGAACTGGAAGCTACATACGAAGAAATCATGAAAGATGAGTCTTTCTGGGAAGAATTCAATGACCTGCTGCGCGATTATGCGGGTCGTCCGACTCCACTGTACTTCGCACGTCGTCTGTCCGAAAAATACGGTGCTCGCGTATATCTGAAACGTGAAGACCTGCTGCATACTGGTGCGCATAAAATCAATAACGCTACCGGCCAGGTTCTGCTGGCAAAAAAAATGGGCAAAACCCGTATCATTGCTGAAACGGGTGCTGGTCAGCACGGCGTAGCAACTGCTGCCGCAGCAGCGCTGTTCGGTATGGAATGTGTAATCTATATGGGCGAAGAA…
2	Tri-100-3-E	Tri-100-3	6	2	K39E, T117A, V227M, K270E, A349S, N380D	TmTriple	ATGAAAGGCTACTTCGGTCCGTACGGTGGCCAGTACGTGCCAGAAATCCTGATGGGAGCTCTGGAAGAACTGGAAGCTGCGTACGAAGAAATCATGAAAGATGAGTCTTTCTGGGAAGAATTCAATGACCTGCTGCGCGATTATGCGGGTCGTCCGACTCCGCTGTACTTCGCACGTCGTCTGTCCGAAAAATACGGTGCTCGCGTATATCTGAAACGTGAAGACCTGCTGCATACTGGTGCGCATAAAATCAATAACGCTATCGGCCAGGTTCTGCTGGCAAAAAAAATGGGCAAAACCCGTATCATTGCTGAAACGGGTGCTGGTCAGCACGGCGTAGCAACTGCTGCCGCAGCAGCGCTGTTCGGTATGGAATGTGTAATCTATATGGGCGAAGAA…
2	Tri-100-3-F	Tri-100-3	5	2	K39E, T117A, A225V, V227M, K270E	TmTriple	ATGAAAGGCTACTTCGGTCCGTACGGTGGCCAGTACGTGCCAGAAATCCTGATGGGAGCTCTGGAAGAACTGGAAGCTGCGTACGAAGAAATCATGAAAGATGAGTCTTTCTGGGAAGAATTCAATGACCTGCTGCGCGATTATGCGGGTCGTCCGACTCCGCTGTACTTCGCACGTCGTCTGTCCGAAAAATACGGTGCTCGCGTATATCTGAAACGTGAAGACCTGCTGCATACTGGTGCGCATAAAATCAATAACGCTATCGGCCAGGTTCTGCTGGCAAAAAAAATGGGCAAAACCCGTATCATTGCTGAAACGGGTGCTGGTCAGCACGGCGTAGCAACTGCTGCCGCAGCAGCGCTGTTCGGTATGGAATGTGTAATCTATATGGGCGAAGAA…
2	Tri-100-4-D	Tri-100-4	8	7	G3D, E15Q, K33E, R60C, I102T, N167D, E333G, S335P	TmTriple	ATGAAAGACTACTTCGGTCCGTACGGTGGCCAGTACGTGCCACAAATCCTGATGGGAGCTCTGGAAGAACTGGAAGCTGCATACGAAGAAATCATGGAAGATGAGTCTTTCTGGAAAGAATTCAATGACCTGCTGCGCGATTATGCGGGTCGTCCGACTCCGCTGTACTTCGCACGTTGTCTGTCCGAAAAATACGGTGCTCGCGTATATCTGAAACGTGAAGACCTGCTGCATACTGGTGCACATAAAATCAACAACGCTATCGGCCAGGTTCTGCTGGCAAAAAAAATGGGCAAAACCCGCACCATTGCTGAAACGGGTGCTGGTCAGCACGGCGTAGCAACTGCTACCGCAGCAGCGCTGTTCGGTATGGAATGTGTAATCTATATGGGCGAAGAA…
2	Tri-100-4-E	Tri-100-4	7	5	G3D, R46H, F57Y, A118T, V155A, N167D, W286C	TmTriple	ATGAAAGACTACTTCGGTCCGTACGGTGGCCAATACGTGCCAGAAATCCTGATGGGAGCTCTGGAAGAACTGGAAGCTGCATACGAAGAAATCATGAAAGATGAGTCTTTCTGGAAAGAATTCAATGACCTGCTGCACGATTATGCGGGTCGTCCGACTCCGCTGTACTACGCACGTCGTCTGTCCGAAAAATACGGTGCTCGCGTATACCTGAAACGTGAAGACCTGCTGCATACTGGTGCGCATAAAATCAATAACGCTATCGGCCAGGTTCTGCTGGCAAAAAAAATGGGCAAAACCCGTATCATTGCTGAAACGGGTGCTGGTCAGCACGGCGTAGCAACTGCTACCACAGCAGCGCTATTCGGTATGGAATGTGTAATCTATATGGGCGAAGAA…
2	Tri-100-4-F	Tri-100-4	6	8	G3D, A58T, R60C, T161I, N167D, D320N	TmTriple	ATGAAAGACTACTTCGGTCCGTACGGTGGCCAATACGTGCCAGAAATCCTGATGGGAGCTCTGGAAGAGCTGGAAGCTGCATACGAAGAAATCATGAAAGATGAGTCTTTCTGGAAAGAATTCAATGACCTGCTGCGCGATTATGCGGGTCGTCCGACTCCGCTGTACTTCACACGCTGTCTGTCCGAAAAATACGGTGCTCGCGTATATCTGAAACGTGAAGACCTGCTGCATACTGGTGCACATAAAATCAACAACGCTATCGGCCAGGTTCTGCTGGCAAAAAAAATGGGCAAAACCCGCATCATTGCTGAAACGGGTGCTGGTCAGCACGGCGTAGCAACTGCTACCGCAGCAGCGCTGTTCGGTATGGAATGTGTAATCTATATGGGCGAAGAA…
2	Tri-100-4-G	Tri-100-4	6	6	G3D, R60C, I102T, N167D, H191Q, D284G	TmTriple	ATGAAAGACTACTTCGGTCCGTACGGTGGCCAGTACGTGCCAGAAATCCTGATGGGAGCTCTGGAAGAACTGGAAGCTGCATACGAAGAAATCATGAAAGATGAGTCTTTCTGGAAAGAATTCAATGACCTGCTGCGCGATTATGCGGGTCGTCCGACTCCGCTGTACTTCGCACGTTGTCTGTCCGAAAAATACGGTGCTCGCGTATATCTGAAACGTGAAGACCTGCTGCATACTGGTGCACATAAAATCAACAACGCTATCGGCCAGGTTCTGCTGGCAAAAAAAATGGGCAAAACCCGCACCATTGCTGAAACGGGTGCTGGTCAGCACGGCGTAGCAACTGCTACCGCAGCAGCGCTGTTCGGTATGGAATGTGTAATCTATATGGGCGAAGAA…
